21 **Precis:** We demonstrate a custom system for facial photogrammetry (Photogrammetry for  
22 Anatomical CarE -PHACE) to produce 3D renderings of facial volume and morphology which  
23 compares with more expensive alternative 3D scanning technologies.

24 **Abstract**

25 Purpose: To compare a custom Photogrammetry for Anatomical CarE (PHACE) system with other  
26 cost-effective 3-dimensional (3D) facial scanning systems to objectively characterize morphology  
27 and volume of periorbital and adnexal anatomy.

28  
29 Methods: The imaging systems evaluated include the low-cost custom PHACE system and  
30 commercial software product for the iPhone called Scandy Pro (iScandy) application (Scandy,  
31 USA), and the mid-priced Einscan Pro 2X (Shining3D Technologies, China) device and Array of  
32 Reconstructed Cameras 7 (ARC7) facial scanner (Bellus3D, USA). Imaging was performed on a  
33 manikin facemask and humans with various Fitzpatrick scores. Scanner attributes were assessed  
34 using mesh density, reproducibility, surface deviation, and emulation of 3D printed phantom  
35 lesions affixed above the superciliary arch (brow line).

36  
37 Results: The Einscan served as a reference for lower cost imaging systems because it qualitatively  
38 and quantitatively renders facial morphology with the highest mesh density, reproducibility ( $0.13$   
39  $\pm 0.10$  mm), and volume recapitulation (approximately 2% of 33.5  $\mu$ L). Compared to the Einscan,  
40 the PHACE system ( $0.35 \pm 0.03$  mm,  $0.33 \pm 0.16$  mm) demonstrated non-inferior mean accuracy  
41 and reproducibility root mean square (RMS) compared to the iScandy ( $0.42 \pm 0.13$  mm,  $0.58 \pm$   
42  $0.09$  mm), and significantly more expensive ARC7 ( $0.42 \pm 0.03$  mm,  $0.26 \pm 0.09$  mm). Similarly,  
43 the PHACE system showed non-inferior volumetric modeling when rendering a 124  $\mu$ L phantom  
44 lesion compared to the iScandy and more costly ARC7 (mean percent difference from the Einscan:  
45  $4.68 \pm 3.73\%$ ,  $9.09 \pm 0.94\%$ , and  $21.99 \pm 17.91\%$  respectively).

46

47 Conclusions: The affordable PHACE system accurately measures periorbital soft tissue as well as  
48 other established mid-cost facial scanning systems. Additionally, the portability, affordability, and  
49 adaptability of PHACE can facilitate widespread adoption of 3D facial anthropometric technology  
50 as an objective measurement tool in ophthalmology.

## 51 INTRODUCTION

52 Three dimensional (3D) digital surface reconstruction technologies and analyses have been  
53 increasingly applied to the fields of architecture, surveying, agriculture, sports, and medicine. In  
54 ophthalmology, two-dimensional photogrammetry has previously been used to evaluate and  
55 monitor tumor pathology, as well as follow a patient during the peri-operative period.<sup>1-5</sup> The  
56 advantage of 3D facial anthropometric measurements is the ability to non-invasively measure,  
57 reconstruct, and analyze diverse pathologies that could affect clinical decision making. For  
58 example, continued advancements in 3D facial anthropometry have assisted in craniofacial flap  
59 planning and creation for cleft lip and palate repair, as well as helped to accurately quantify facial  
60 skin wrinkles and scars before and after laser resurfacing.<sup>6-8</sup>

61 These technologies typically fall under two categories: photogrammetry and structured  
62 light sensing. Photogrammetry is the 3D spatial reconstruction of shapes and features derived from  
63 the mathematical analyses of photographs acquired from multiple vergence angles.<sup>9</sup> Objects in  
64 photographs are computationally aligned in 3D digital space to create object feature coordinates  
65 that are subsequently used to generate 3D surfaces.<sup>9</sup> Structured light technologies, in contrast,  
66 project a known pattern of light onto a subject, which are then captured by cameras from two  
67 different angles of known deviation. Each camera captures differences in the projected pattern as  
68 the light becomes distorted while conforming to an object's surface. Differences in pattern  
69 distortion are stored in reference matrices that correlate the objects' camera coordinates to sets of  
70 relative spatial coordinates and are ultimately used to render a 3D surface model of the object.<sup>10</sup>

71 Available facial photogrammetry technologies include the 3dMD Face System (3dMD,  
72 Atlanta, GA), Vectra H1 or XT (Canfield Scientific Inc., Fairfield, NJ), and Eva (Artec 3D,  
73 Luxembourg). 3dMD products use structured light sensors and are considered "active" scanners

74 as these devices contain a light source for optimized data capture. However, portability is limited  
75 due to large, multi-camera systems. The Vectra H1 and the Eva use photogrammetry and are  
76 “passive” scanners since subjects are illuminated using ambient light. Though less expensive than  
77 the 3dMD suite, these passive scanners have been less accurate due to sequential imaging and total  
78 duration of data acquisition.<sup>11–13</sup> The 3dMD Face System costs approximately \$25,000 USD, the  
79 Vectra H1 \$13,000 USD and the Eva \$15,000 USD.<sup>14</sup> Although 3D anthropometry can augment  
80 standard clinical care and further inform medical decision making, technologies are not widely  
81 implemented due to cost, lack of portability, and training required for complicated scanning  
82 systems. Thus, we sought to compare and evaluate alternative low-cost 3D facial modeling systems  
83 for widespread clinical use.

84

## 85 **METHODS**

86 This study received Institutional Review Board approval from the University of California,  
87 Irvine and was conducted in accordance with the Declaration of Helsinki. Studies performed were  
88 HIPAA-compliant and all participants enrolled provided written informed consent.

89

90 **Study Design.** We compared a customized low-cost automated photogrammetric facial scanning  
91 system, termed the Photogrammetry for Anatomical CarE (PHACE) system, with other low- and  
92 mid-priced 3D scanning technologies that employed structured light to acquire scan data. 3D  
93 scanners that cost less than \$1000 were considered low-cost and scanners more than \$1000 but  
94 below \$10,000 were considered mid-priced. PHACE and the iPhone Scandy Pro smartphone  
95 application (version 1.9.10, Scandy, USA) are low-cost systems, whereas the Einscan Pro 2X  
96 (Shining 3D Technologies, China) and Array of Reconstructed Cameras 7 (ARC7) facial scanner

97 (Bellus 3D, USA) are two mid-priced structured light sensing scanners. Four tests were performed  
98 to characterize the utility and limitations of each technique for clinical use. To evaluate precision  
99 we quantified 3D model mesh density and reproducibility using both human subject models and a  
100 mannikin face mask. To evaluate scan accuracy we considered the Einscan 3D to be the reference  
101 test and compared the 3D model surface deviation and volume emulation from the other mid-price  
102 scanner and the two low-cost scanners. The mannikin was scanned in triplicate, and human  
103 subjects were scanned once with each of the 4 scanning modalities. Healthy adults of various  
104 Fitzpatrick skin pigmentation scores were included (mean age  $30 \pm 5$  years; three males; one  
105 European, one East Asian, and one African descent). The manikin facemask was used to assess  
106 3D scanning accuracy and reproducibility since it eliminated facial movement as a source of error  
107 and incorporated facial contours. All faces were scanned in the same environment, location, and  
108 by a single trained researcher.

109  
110 **Facial Scanning Systems.** The PHACE system has been previously described by To et al.<sup>15</sup>  
111 Briefly, the PHACE system used off-the-shelf motorized turntables to rotate two Google Pixel 3  
112 smartphones (Android 11 operating system) 360 degrees. Photographs were imported into  
113 Metashape (Agisoft, St. Petersburg, Russia) and an in-house computer script was used to construct  
114 and store photogrammetric 3D renderings on a local computer. The constructed photogrammetric  
115 3D renders were exported as a wavefront object (.OBJ) into the 3D point cloud open source  
116 software CloudCompare (CC) where models were scaled and analysed<sup>16</sup>.

117 The handheld Einscan captured data using structured white light and the company's  
118 proprietary software (EXScan Pro v3.4.05). Resolution was set to maximum (0.2 mm) and the  
119 scanner held approximately 18 inches from the subject. The scanner was rotated around the

120 subject's face approximately 225 degrees horizontally (ear to ear) and 140 degrees vertically  
121 (forehead to chin).

122 The iPhone Scandy Pro application utilized the built-in infrared (IR) structured light *True*  
123 *Depth* Camera system found on iPhone X models and newer versions. Scans for this study were  
124 acquired with an iPhone 11 with 4GB of RAM (iOS 14). Within the Scandy Pro application,  
125 resolution was maximized (0.5mm) and held approximately 10 inches from the face while  
126 scanning across the face in a path similar to the Einscan.

127 The Bellus ARC7 facial scanner captured data using an array of seven IR structured light  
128 cameras and processed the model within its proprietary software (ARC Scan App v1.8.12). Image  
129 acquisition and processing occurred on a dedicated Windows Surface Pro 6 laptop. During imaging,  
130 the software instructed subjects to rotate their head left and right from shoulder to shoulder  
131 approximately 120 degrees horizontally. Rendered 3D models were exported using maximum  
132 resolution and minimal mesh smoothing.

133 **3D Printed Phantom Lesions.** Phantom lesions consisted of four custom 3D printed hemispheres  
134 used to simulate variable sized ocular and adnexal volumetric pathology. Each hemispheric lesion  
135 was printed using black polylactic acid filament (Hatchbox, California, USA) on a Prusa i3MKS  
136 (Prusa Research, Prague, Czech Republic) 3D printer with a layer accuracy of 150  $\mu\text{m}$ . Subjects'  
137 faces were scanned without the phantom lesions to establish a baseline facial mesh model. Faces  
138 were scanned a second time with the phantoms affixed with double-sided tape approximately 1 cm  
139 above the superciliary arch .

140

141 **Measurements and Analysis.** 3D models from each scanning technique were imported as a  
142 stereolithography (.STL) file into CC, where models were aligned, cropped, registered, and



143 analyzed. Data rendering and analyses was performed on a Gigabyte Z390 Aorus Ultra Gaming  
144 PC running Windows 10 with an Intel Core i9-9900k 8-core CPU @ 3.6GHz, 48 GB of RAM, and  
145 a Nvidia GeForce RTX 2080 graphics card.

146 To analyze the mesh density, 3D scans of the manikin face acquired with the PHACE  
147 system, iScandy, and ARC7 were aligned to one of the Einscan models. Facial scans were further  
148 cropped to the same dimensions (1 mm x 1 mm) at the midline of the glabella. The mesh face  
149 density was subsequently calculated.

150 The reproducibility of each scanning technique was evaluated by measuring the model  
151 deviation between triplicate scans acquired on the same device of the mannikin face. The triplicate  
152 whole facial models were aligned, cropped, registered to each other, and then the distance  
153 deviation between each scan was measured. A quantitative color-coded depth map was used to  
154 represent the deviation between each model for both the periorbita and the entire face. Analysis of  
155 all models was performed for the entire face and for cropped regions, which only included the  
156 periorbital tissues.

157 3D Model accuracy was calculated by analyzing the surface deviation of the manikin 3D  
158 models produced by each scanning modality to a reference model rendered by the Einscan. Prior  
159 studies investigated the Einscan's clinical accuracy by comparing rendered facial measurements  
160 with measurements from a vernier calipers, which showed no statistical differences.<sup>17</sup> 3D models  
161 from each scanning modality were aligned and registered to the Einscan reference model and  
162 cropped to have identical boundaries. The absolute maximum deviation, root mean square (RMS),  
163 and distance mean in addition to standard deviation were calculated. A quantitative color-coded  
164 depth map represented each scanning technique's regional accuracy of the mannikin's face.

165 To quantify the volumetric accuracy of the phantom lesions, facial models with and without  
166 3D printed phantom lesions were exported to CC. Models were manually aligned, automatically  
167 registered to each other using the iterative closest point function, and then exported into  
168 Meshmixer. Facial models without phantom lesions were Boolean subtracted from facial models  
169 with phantom lesions. Hemisphere reference diameters were measured using a digital caliper.  
170 Volumes were calculated for large, medium, small, and mini phantoms with known dimensions of  
171  $19.75 \pm 0.04$  mm (2157  $\mu$ L),  $9.78 \pm 0.05$  mm (260  $\mu$ L),  $4.72 \pm 0.05$  (124  $\mu$ L), and  $2.80 \pm 0.04$  mm  
172 (33.5  $\mu$ L), respectively. Each rendered hemisphere's volume was measured using Meshmixer's  
173 analysis stability tool and compared with reference dimensions.

174

175 **Statistical Analysis.** A Kruskal-Wallis analysis with multiple comparisons and a one-way  
176 ANOVA with Tukey's multiple comparison test (IBM SPSS Statistics 27 (IBM, Armonk)) were  
177 used to compare RMS, distance deviation means, maximum mean absolute deviations, and mean  
178 volume percent difference to evaluate model reproducibility and accuracy. *p*-values less than 0.05  
179 were considered to be significant.

180

## 181 **RESULTS**

182 The advantages and disadvantages of each 3D reconstruction technology is presented in  
183 Table 1.

**Table 1. Cost and Benefits - Different 3D imaging technologies applied to facial scanning**

|                                          | <b>EINSCAN 3D SCANNER</b>         | <b>PHACE</b>               | <b>iScandy</b>            | <b>BELLUS ARC7</b>                   |
|------------------------------------------|-----------------------------------|----------------------------|---------------------------|--------------------------------------|
| Scanning Type                            | Structured white light            | Photographs                | Structured infrared Light | Photos and structured infrared light |
| Manufacturer Precision and Accuracy (mm) | 0.2 – 0.3                         | 1                          | 1                         | 0.4                                  |
| Render Time (min)                        | 7 - 20                            | 25 – 40                    | Immediately               | 1.5                                  |
| Cost (\$USD)                             | 5000                              | 500                        | 700                       | 8000                                 |
| Portability                              | Moderate                          | Moderate                   | Easy                      | Difficult                            |
| Safety                                   | Uncomfortable bright light        | Safe                       | Safe                      | Safe                                 |
| Accessibility                            | Proprietary hardware and software | Uses any mobile phone      | Only on Apple iPhone      | Proprietary hardware and software    |
| Customizable                             | Low                               | High                       | Low                       | Low                                  |
| Imaging Surface                          | Any surface (not black)           | Any non-reflective surface | Any surface               | Face only                            |

184

185 We compared mesh density (Table 2) of each scanning technology by acquiring triplicate  
 186 scans of a manikin mask using each imaging modality. The Einscan created the most consistent  
 187 models (lowest standard deviation between triplicate measurements) with the highest mesh face  
 188 density. The PHACE system produced the fewest mesh faces with 6.5 times fewer mesh faces than  
 189 the Einscan. Both the iScandy and ARC7 produced models with meshes about half the density of  
 190 the Einscan. A statistical significance was seen with fewer mesh faces produced by each modality  
 191 - PHACE, iScandy, and ARC7 compared to Einscan.

**TABLE 2. Scanning Precision and Model Reproducibility of Mannikin Face Mask**

| Scanning Modality | Mean Mesh Density | Whole Face Scans             |                                      | Periorbital Anatomy Only     |                                      |
|-------------------|-------------------|------------------------------|--------------------------------------|------------------------------|--------------------------------------|
|                   |                   | Mean Absolute Deviation (mm) | Mean Maximum Absolute Deviation (mm) | Mean Absolute Deviation (mm) | Mean Maximum Absolute Deviation (mm) |
| Einscan           | 90.33 ± 3.51*     | 0.01 ± 0.00, NS              | 0.23 ± 0.04*                         | 0.01 ± 0.00, NS              | 0.20 ± 0.03*                         |
| PHACE System      | 13.33 ± 1.15*     | 0.01 ± 0.01, NS              | 1.76 ± 0.41*                         | 0.07 ± 0.03*                 | 0.86 ± 0.22*                         |
| iScandy           | 42.67 ± 4.93*     | 0.04 ± 0.04, NS              | 1.71 ± 0.70*                         | 0.02 ± 0.01, NS              | 1.06 ± 0.23*                         |
| ARC7              | 37.33 ± 1.15*     | 0.01 ± 0.01, NS              | 1.13 ± 0.25*                         | 0.04 ± 0.02, NS              | 1.11 ± 0.25*                         |

\*  $p$ -value  $\leq 0.05$ ; NS, not significant

192

193 The reproducibility of each scanning modality is shown in Figure 1 and Table 2. The  
 194 Einscan renders models with the highest reproducibility (lowest RMS, mean absolute deviation,  
 195 and mean maximum absolute deviation) and precision (lowest standard deviation). The Einscan

196 demonstrated better reproducibility compared to PHACE ( $P = .007$ ) and iScandy ( $P = .001$ ) for  
197 an inanimate face when analyzing either the whole face or periorbita alone but not compared to  
198 the ARC7 ( $P = .475$ ). The iScandy demonstrated the lowest reproducibility when scanning the  
199 whole manikin face (highest mean absolute deviation, standard deviation, and RMS). The PHACE  
200 system demonstrated lowest reliability when modelling the nose. No statistically significant  
201 differences in reproducibility between PHACE and all other imaging modalities was observed  
202 when rendering the the whole face.

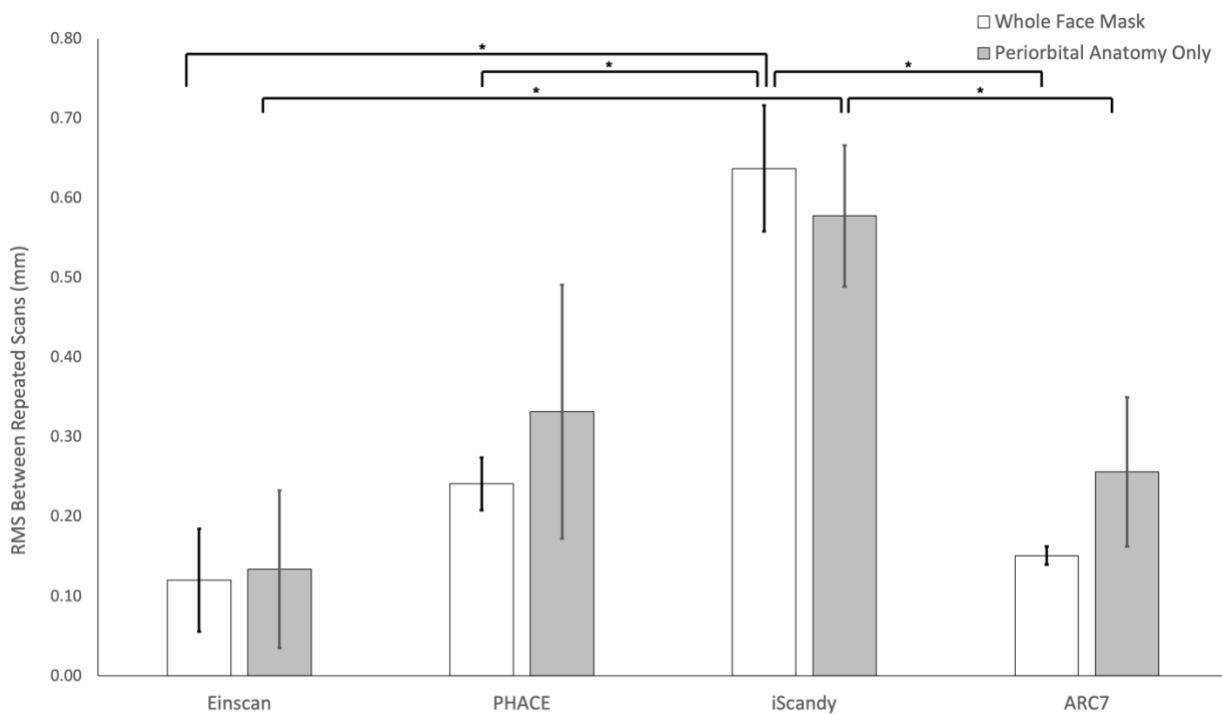

203  
204 FIG. 1. Comparison of the interscan RMS of three independently acquired scans of the same  
205 model to evaluate scanner reproducibility.  
206 3D models of a manikin facemask were produced with each scanning technology (Fig. 2)  
207 where the accuracy and precision were subsequently compared using the Einscan model as a  
208 reference (Table 3). Displacement of 3D renders from the reference model are represented as  
209 quantitative deviation color maps (Fig. 2E-H). In the deviation maps, the color blue indicates  
inward deviation toward the center of the model, red indicates outward deviation from the model's

210 surface, and the color scale bar indicates the degree of deviation in millimeters. The color map  
211 produced for the Einscan model showed no deviation from itself (Fig. 2E) as it is the reference for  
212 the other modalities. The PHACE system modeled facial features similar to the iScandy except for  
213 the inward deviation along the nose (Fig. 2F) in the PHACE model and along the right parietal  
214 ridge (Fig. 2F) in the iScandy model. The iScandy and PHACE consistently created whole face  
215 3D models with lower mean deviation and RMS (Table 3), which was also reflected by the  
216 deviation color maps (Fig. 2F – 2H). Models rendered from the ARC7 device often create facial  
217 models with significant outward deviation along the top of the head (Fig. 2H) and create false  
218 eyelid contours (2D white arrows) in the setting of absent globes in the manikin model (arrows in  
219 Fig. 2D). There were no statistically significant differences in periorbital and adnexal soft tissue  
220 mean deviation or RMS between all three modalities (Table 3) when compared with Einscan.

**TABLE 3.** Scanning accuracy using the Einscan model as a reference

| Scanning Modality | Whole Face Scans    |               | Periorbital Anatomy Only Soft Tissue |                 |
|-------------------|---------------------|---------------|--------------------------------------|-----------------|
|                   | Mean Deviation (mm) | Mean RMS (mm) | Mean Deviation (mm)                  | Mean RMS (mm)   |
| PHACE System      | 0.01 ± 0.14*        | 0.58 ± 0.10*  | 0.03 ± 0.05, NS                      | 0.35 ± 0.03, NS |
| iScandy           | -0.23 ± 0.15*       | 0.69 ± 0.20*  | 0.00 ± 0.01, NS                      | 0.42 ± 0.13, NS |
| ARC7              | 1.49 ± 0.50*        | 3.04 ± 1.00*  | 0.06 ± 0.03, NS                      | 0.42 ± 0.03, NS |

\*  $p$ -value  $\leq 0.05$ ; NS, not significant

221

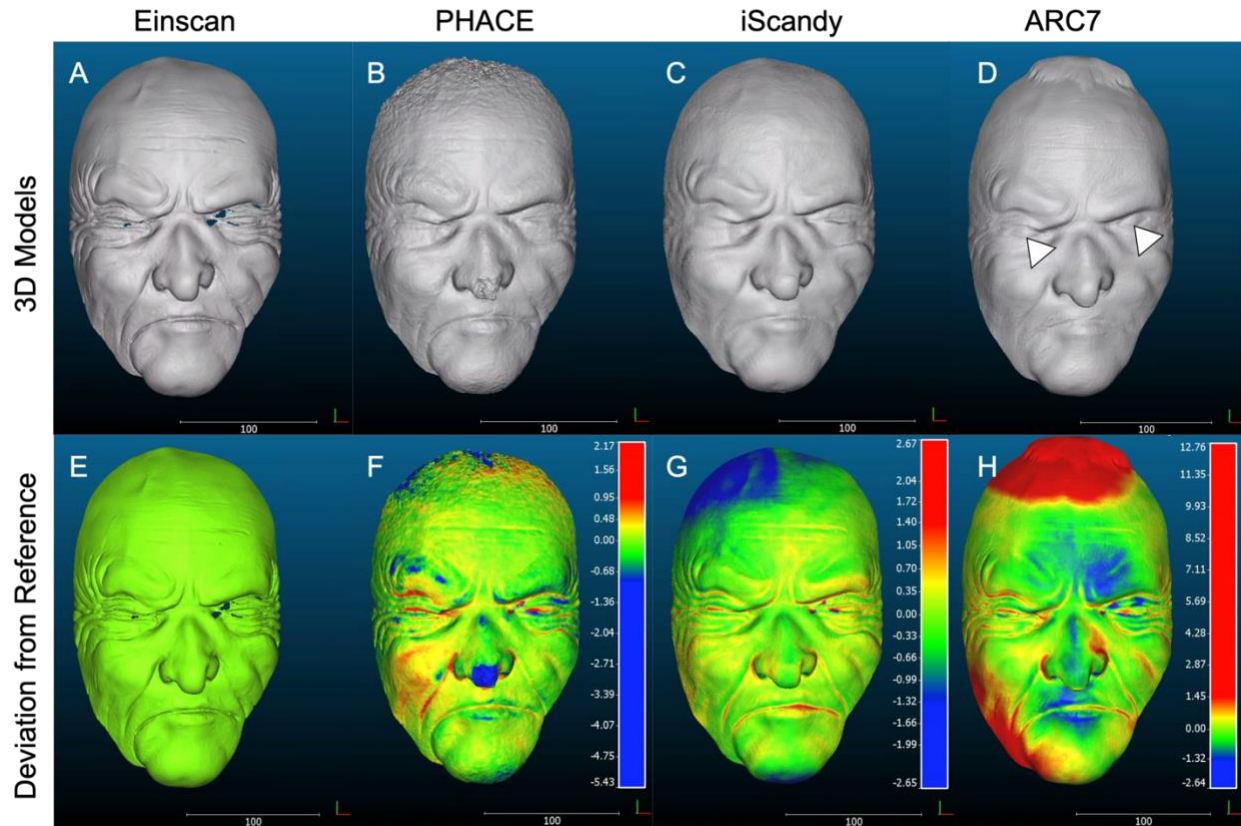

222

FIG. 2. Comparison of 3D models of a manikin facemask produced with each scanning technology using the Einscan methodology as a reference. (A-D) Rendered mesh models of the manikin facemask. (E-H) Rendered models where color maps indicating amount of deviation from Einscan reference scan (A). Scale bar is in millimeters.

223

224

225 Digitally measured volumes of rendered dome-shaped phantom lesions affixed to the  
226 superciliary area (brow line) were compared with calculated volumes based on the diameters  
227 measured with a digital caliper. The Einscan qualitatively and quantitatively yielded models with  
228 the highest precision and accuracy (Fig. 3A and E). The quantitative comparison for volumetric  
229 measurements of phantoms using Einscan, PHACE, iScandy, and ARC7 systems are shown in  
230 Figure 3E. There were no statistically significant differences between the PHACE, Einscan, and  
231 ARC7 systems for large, medium and small phantom lesions (Fig. 3E). The iScandy scanner



232 rendered larger volumes for medium sized phantoms but all modalities overestimated the true  
 233 volume of mini phantom lesions. The ARC7 produced models that partially recapitulated the mini  
 234 phantoms (Fig. 3D).

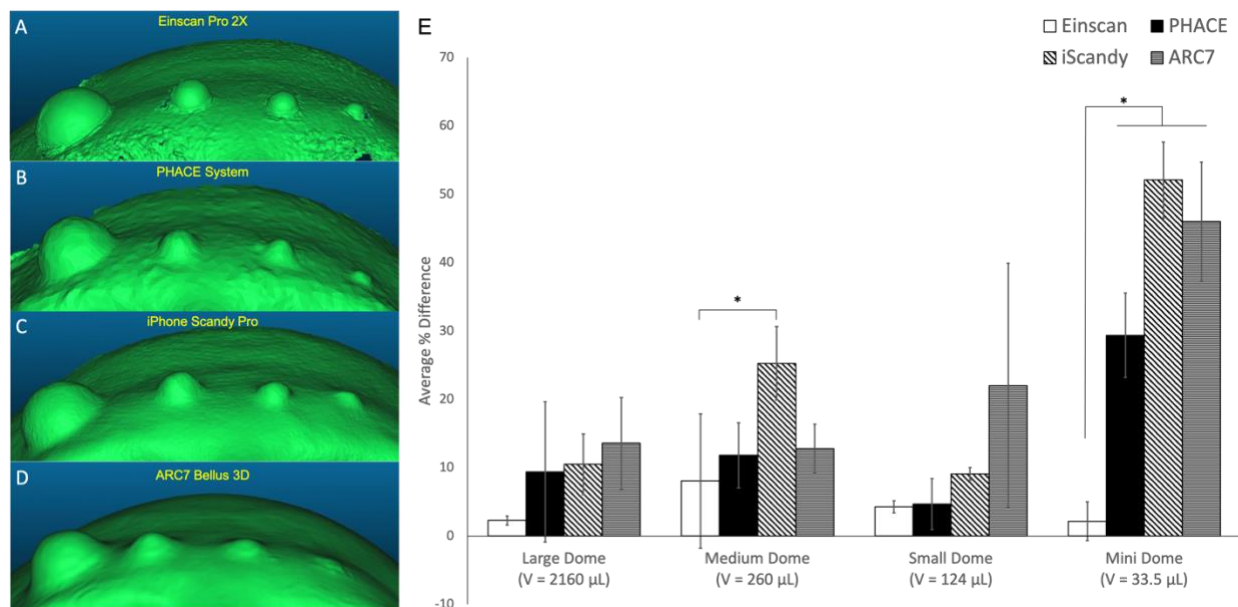

235 FIG. 3. Worm's eye-view of scanned and rendered 3D phantom lesions on participant 3 using  
 236 the Einscan Pro 2X (A), PHACE system (B), iPhone Scandy Pro (C), and ARC7 Bellus 3D  
 237 (D) of participant 2. (E), Comparison of each scanning technique's average percent deviation  
 238 when measuring white phantoms of various sizes placed along the superciliary arch on human  
 239 subjects.  $V$  represents volume of each hemisphere.

239 The Einscan was unable to render models of human faces having different skin tones. The  
 240 Einscan could only render the chin and portion of the cheeks of the subject with Fitzpatrick score  
 241 6 (Fig. 4A), as compared to the individual with Fitzpatrick score 2 (Fig. 4b). The model with  
 242 Fitzpatrick score 6 (Fig. 4A) was missing facial data for for the ears, nose, orbit, periorbital adnexa,  
 243 forehead and dark T-shirt worn by the subject.

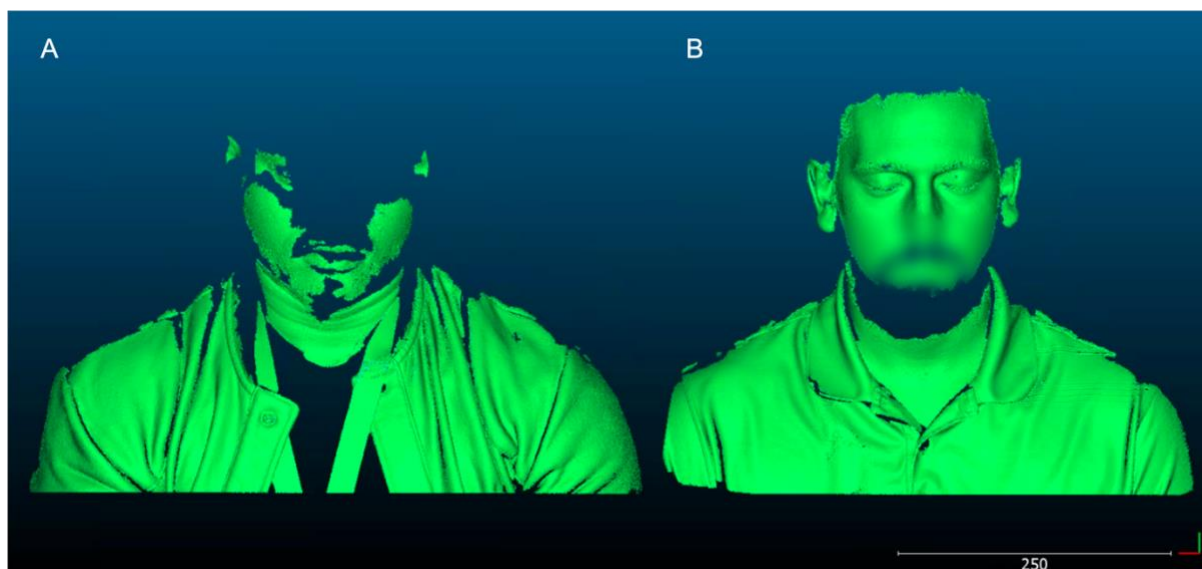

244  
245 FIG. 4, Comparison of 3D reconstructed models using the Einscan. Generated 3D model of a  
246 male with Fitzpatrick score 6 (A) and a male with Fitzpatrick score 2 (B). Scale bar is in  
247 millimeters.

## 247 DISCUSSION

248 3D anthropometry has been extensively applied to craniomaxillofacial surgery to evaluate  
249 surgical and clinical outcomes but its application to the periorbital region has been limited.<sup>18–29</sup>  
250 Recent technical advances have driven down the cost and access to powerful and portable 3D  
251 scanning systems.<sup>14,30–33</sup> Systematic reviews have emphasized that although smart phone-based  
252 scanning systems remain less accurate, their variability remain within a clinically acceptable range  
253 for facial measurements as previously defined by an RMS value less than 2 mm from a standard  
254 reference.<sup>31–34</sup>

255 In this study, we experimentally compared low and mid-cost 3D scanning systems and  
256 discuss their clinical significance and applications. The Einscan Pro 2X was chosen to be the  
257 reference scanning device for accuracy analysis given prior validation of its clinical accuracy and  
258 precision.<sup>17</sup> The accuracy of the PHACE system in our investigation performed better than a  
259 similar smartphone photogrammetry protocol presented by Nightingale et al.<sup>30</sup> The iScandy results



260 demonstrated less accuracy than Rudy et al's iPhone X Scandy App study but still well within the  
261 clinically acceptable range (RMS < 2 mm).<sup>14</sup> The limitation in Nightingale et al's study was its  
262 exclusion of rendered data and analysis for the eyes and mouth, which, as our data from our human  
263 studies have demonstrated, are areas with the most variability due to small microexpressions. The  
264 reduced reproducibility of the PHACE system is likely related to perspective distortion from  
265 multiple camera vergence angles and magnitude of the depth difference between the nose and the  
266 remainder of the face. This may be overcome with telecentric lenses and greater distances between  
267 the subject and the camera. To the authors' knowledge, the accuracy and efficacy of the ARC7  
268 device has never been compared with other devices in a similar price range.

269 While published validation methods rely on displacement analysis and color depth maps  
270 to evaluate 3D model accuracy and precision of periorbital soft tissue, few studies used volumetry  
271 to investigate the accuracy of 3D anthropometric devices.<sup>21</sup> Other than To et al, there are no studies  
272 to our knowledge that use volumetry to evaluate low-cost 3D facial scanning systems.<sup>15</sup>  
273 Displacement analysis focuses on distances between mesh surfaces of a model and reference,  
274 which less clearly represent morphological changes seen more plainly with volume analysis. For  
275 example, volume analysis can more clearly depict quantitative changes in planar facial morphology  
276 that do not have depth changes such as a growing facial lesion. Therefore, it is important to not  
277 only measure the linear distance changes between analyzed and reference models but also measure  
278 the total *in vivo* volumetric changes. Our approach to assessing digital facial reconstruction  
279 techniques used phantom lesions made of 3D printed phantoms attached to the brow. Because the  
280 phantoms were printed with 100  $\mu\text{m}$  resolution and measured with a digital caliper with 20  $\mu\text{m}$   
281 resolution, accurate volume calculations are possible since the error propagation due to  
282 measurement uncertainties remains lower than the resolution of each scanning modality. Accurate

283 volume calculations permit the phantom lesions to be used as a known reference to compare  
284 measured volumes. Both the Bellus and iScandy had significant average percent differences from  
285 the calculated hemispheric volumes, which could possibly be due to a resolution limitation of  
286 structured IR light – as opposed to shorter wavelengths included in structured white light (Einscan)  
287 that discriminates facial details such as pigmented cutaneous features, rhytids and larger contours.

288         When a 3D model is generated, the mesh face density determines the smallest  
289 morphological features detectable by each scanning technique. The mesh face density has the  
290 potential to limit the model’s precision and accuracy. Differences in the number of projected  
291 structured light patterns from the Einscan, iScandy, and Bellus likely contributed to differences in  
292 model mesh density, with the Einscan projecting the highest density of structured light points. The  
293 PHACE system uses photogrammetric computation to infer mesh points from 80-120 images. The  
294 fewer number of data points compared to the density of structure light data may explain the low  
295 mesh density derived from PHACE models. The higher the mesh face density the lower the  
296 likelihood that it will be a limiting factor for model precision and accuracy.

297         The accuracy of each modality was assessed by analyzing the deviation between the  
298 rendered manikin face generated from the PHACE system, iScandy, and ARC7 compared to the  
299 Einscan reference model. Accuracy based on the RMS calculations indicated that the PHACE  
300 system and iScandy can statistically render a whole face model more accurately than the ARC7.  
301 However, color-coded depth maps more clearly indicated areas of inaccuracies, which gives users  
302 the opportunity to assess the utility and applicability of particular facial compartments. The ARC7  
303 discrepancy in RMS between the whole face and periorbital tissue alone was due to the isolated  
304 but significant deviation along the superior coronal suture of the models. This deviation was  
305 possibly due to a combination of the IR light reflecting off the head of the manikin face as well as

306 the need to turn the head during facial scanning acquisition, which may have led to software  
307 tracking inconsistencies. In isolating the periorbital soft tissue, both the RMS and color depth map  
308 indicated a high degree of accuracy and no statistically significant difference between the PHACE  
309 system, iScandy, and ARC7. Moreover, when adding both the quantitative and qualitative  
310 volumetry data to evaluate accuracy, the results indicated there are no statistically significant  
311 differences in accuracy between all three scanning modalities and each system could correctly  
312 render volumes as small as 124  $\mu\text{L}$ . Therefore, the RMS, quantitative color-coded depth map, and  
313 volumetry data all indicated similarly clinically significant, accurate performance between the  
314 low-cost facial scanning systems and the ARC7.

315 The whole face quantitative color-coded depth map was useful to indicate inaccuracies of  
316 specific regions of facial models. The PHACE system inconsistently rendered prominent nose  
317 models, which was likely due to the limited image perspective data restricted due to the constrained  
318 angles that the cameras have with respect to the face. Moreover, in a prior characterization study  
319 of the PHACE system, the nose was inaccurately rendered in only two out of fifteen subjects.[To  
320 et. al] Therefore, in subjects with prominent noses cameras in the PHACE system could be  
321 positioned further apart to increase the perspective data for wider vergence angles.

322  
323 **Clinical Applications.** The Einscan 3D scanner was shown to most accurately and precisely  
324 recapitulate inanimate objects and human faces; however, it was notably limited to lighter skin  
325 tones, with Fitzpatrick scores 1-4. Because the Einscan Pro 2X used white structured light, an  
326 absence of reflected light from dark surfaces impeded data acquisition and model rendering. This  
327 limitation may be addressed with next generation systems produced by Shining3D.

328           The PHACE system recapitulates facial morphology and volumetry as accurately as other  
329 low and mid-cost options and is independent of Fitzpatrick score. The PHACE system was the  
330 most cost-effective and accessible modality since it can use any smartphone. The total cost of the  
331 system is a few hundred dollars as opposed to a few thousand dollars for competing proprietary  
332 hardware and software. Additionally, minimal training was required as the data acquisition and  
333 model processing was nearly completely automated. The PHACE technique also includes the  
334 added benefit of producing a large photographic dataset from multiple angles for subsequent 2D  
335 image analysis if needed. However, the PHACE system required the most time to render a precise  
336 and accurate 3D model and occasionally modeled noses with prominent bridges inaccurately. In  
337 the clinic, the PHACE system is best suited for modeling facial morphology, depth, and volumetric  
338 changes of the orbit and adnexal tissues.

339           The iPhone Scandy Pro application was an affordable/cost-effective option that used high  
340 resolution IR structured light via the *True Depth Camera* found in newer generation iPhones  
341 (iPhone X and later). Furthermore, the iOS Scandy Pro app allowed all data acquisition, model  
342 processing, and storage to occur completely offline on the iPhone device without the need to send  
343 personally identifiable facial data to the cloud, unlike the Bellus3D iOS FaceApp. Additionally,  
344 the Scandy Pro app immediately generated models after scanning and consistently recapitulated  
345 most regions of the face, including the noses with prominent bridges. The iPhone Scandy Pro  
346 application is best suited for capturing whole face models in a situation that required a portable  
347 system such as at the slit lamp, bedside, and before/after surgery.

348           The ARC7 facial scanner acquired data and rendered a model in the shortest time between  
349 the four evaluated scanning modalities. Although the documentation was unclear as to how  
350 Bellus3D renders the final facial model, the company's developer overview and API

351 documentation indicate a facial tracking function using software.<sup>35,36</sup> Therefore, it was possible  
352 that significantly atypical facial morphology that was not recognized by the software could reduce  
353 model accuracy. Moreover, the ARC7 is limited to imaging faces only. Therefore, the Bellus3D  
354 ARC7 facial scanner is suitable for medical contexts that require facial models to be created  
355 quickly, have grossly normal anatomical features, and only need anthropometric measurements  
356 from the forehead to the chin.

357 Overall, the PHACE system performed similarly to other low and mid-cost scanners and it  
358 is the most economical, accessible, and easy to use 3D anthropometric scanning tool. The iPhone  
359 Scandy Pro modeling technique is the most portable system that can consistently and quickly  
360 capture and render full face 3D models. The ARC7 is the fastest facial scanning system, whereas  
361 the Einscan is the most accurate and precise scanning system but exhibits limited use.

362  
363 **Limitations.** Limitations to this study can narrow the scope of clinical applicability. Subtle micro  
364 expressions drastically reduce the ability for standardized comparisons between models and  
365 ultimately lower the sensitivity of the analysis. In theory, after reconstructed models are registered  
366 to each other in 3D space, all changes detected are due to external factors altering the region of  
367 interest. In the clinical setting, changes between models will ideally be due to systemic or facial  
368 pathology, such as thyroid eye disease, trauma, burn, or infiltrative diseases that alter tissue volume  
369 and depth. However, facial micro-expression can alter the 3D model. Furthermore, when  
370 reconstructed models are registered in 3D space, subtle non-region of interest changes can alter  
371 the efficacy of the alignment and registration of the models to each other. Although the  
372 reconstructed models may be misaligned on the order of millimeters, the smaller the features being  
373 measured (e.g., a millimeter sized lesion) the greater the artificial change contributes to the error.

374 An additional limitation of this study was that all human subjects were imaged with their  
375 eyes closed because each of the scanning systems struggled to render transparent/translucent  
376 surfaces, such as the cornea. To obviate imaging the cornea directly, scans were taken with eyes  
377 closed so that the skin covering the orbit could be imaged to represent depth and volume of the  
378 cornea. Currently all light based photogrammetric and structured light systems also struggle with  
379 accurately capturing and rendering periorbital tissue with eyes open. The next advances in 3D facial  
380 anthropometry development for periorbital soft tissue may benefit from methods to accurately  
381 represent transparent tissue such as the cornea.

382 In conclusion, we have qualitatively and quantitatively compared 3D facial models  
383 generated from affordable 3D reconstruction technologies. Implementing these techniques to study  
384 changes in the midface and orbital adnexa warrants further investigation to gain understanding of  
385 the value of these methods for objective facial anthropometry in a clinical setting.

## 386 **References**

- 387 1. Takamoto T, Schwartz B. Photogrammetric Measurement of Nerve Fiver Layer  
388 Thickness. *Ophthalmology*. 1989;96(9):1315-1319. doi:10.1016/S0161-6420(89)32720-5
- 389 2. Kaderli A, Katircioglu Y, Singar Ozdemir E, Kaderli ST. Long-term comparison of the  
390 efficacies of internal and external browpexy combined with blepharoplasty Comparação a  
391 longo prazo da eficácia de browpexy interna ou externa associada à blefaroplastia. *Arq*  
392 *Bras Oftalmol*. 2020;83(3):185-194. doi:10.5935/0004-2749.20200033
- 393 3. Romano PE. Simple photogrammetric diagnosis of optic nerve hypoplasia. *Arch*  
394 *Ophthalmol*. 1989;107(6):824-826. doi:10.1001/archophth.1989.01070010846026
- 395 4. Azuara-Blanco A, Spaeth GL. Methods to objectify reversibility of glaucomatous  
396 cupping. *Curr Opin Ophthalmol*. 1997;8(2):50-54. doi:10.1097/00055735-199704000-  
397 00009
- 398 5. Choi HKY, Lin W, Loon SC, et al. Facial Scanning with a Digital Camera: A Novel Way  
399 of Screening for Primary Angle Closure. *J Glaucoma*. 2015;24(7):522-526.  
400 doi:10.1097/IJG.0000000000000017
- 401 6. Markiewicz MR, Bell RB. The Use of 3D Imaging Tools in Facial Plastic Surgery. *Facial*  
402 *Plast Surg Clin North Am*. 2011;19(4):655-682. doi:10.1016/j.fsc.2011.07.009
- 403 7. Ey-Chmielewska H, Chruściel-Nogalska M, Frączak B. Photogrammetry and its potential  
404 application in medical science on the basis of selected literature. *Adv Clin Exp Med*.  
405 2015;24(4):737-741. doi:10.17219/acem/58951
- 406 8. Machado BHB, Ivy ID, Pautrat WM, Frame J, Najlah M. Scientific validation of three-  
407 dimensional stereophotogrammetry compared to the IG AIS clinical scale for assessing  
408 wrinkles and scars after laser treatment. *Sci Rep*. 2021;11(1):1-11. doi:10.1038/s41598-

- 409 021-91922-9
- 410 9. Heike CL, Upson K, Stuhaug E, Weinberg SM. 3D digital stereophotogrammetry: A  
411 practical guide to facial image acquisition. *Head Face Med.* 2010;6(1):1-11.  
412 doi:10.1186/1746-160X-6-18
- 413 10. Lekakis G, Claes P, Hamilton GS, Hellings PW. Three-Dimensional Surface Imaging and  
414 the Continuous Evolution of Preoperative and Postoperative Assessment in Rhinoplasty.  
415 *Facial Plast Surg.* 2016;32(1):88-94. doi:10.1055/s-0035-1570122
- 416 11. Verhulst A, Hol M, Vreeken R, Becking A, Ulrich D, Maal T. Three-Dimensional  
417 Imaging of the Face: A Comparison between Three Different Imaging Modalities.  
418 *Aesthetic Surg J.* 2018;38(6):579-585. doi:10.1093/asj/sjx227
- 419 12. L C, M B, WW L, et al. Validation of the Vectra H1 portable three-dimensional  
420 photogrammetry system for facial imaging. *Int J Oral Maxillofac Surg.* 2018;47(3):403-  
421 410. doi:10.1016/J.IJOM.2017.08.008
- 422 13. CH T, NM A, I P, et al. Comparison of three-dimensional surface-imaging systems. *J*  
423 *Plast Reconstr Aesthet Surg.* 2014;67(4):489-497. doi:10.1016/J.BJPS.2014.01.003
- 424 14. Rudy HL, Wake N, Yee J, Garfein ES, Tepper OM. Three-Dimensional Facial Scanning  
425 at the Fingertips of Patients and Surgeons: Accuracy and Precision Testing of iPhone X  
426 Three-Dimensional Scanner. *Plast Reconstr Surg.* 2020:1407-1417.  
427 doi:10.1097/PRS.00000000000007387
- 428 15. To JK, Vu AN, Pai A, Ediriwickrema LS, Browne AW. Optimization of a  
429 PHotogrammetry for Automated Anatomical CarE. 2021.
- 430 16. Girardeau-Montaut D. Cloudcompare-open source project. 2011.  
431 <https://www.danielgm.net/cc/>.



- 432 17. Amornvit P, Sanohkan S. The accuracy of digital face scans obtained from 3D scanners:  
433 An in vitro study. *Int J Environ Res Public Health*. 2019;16(24).  
434 doi:10.3390/ijerph16245061
- 435 18. Knoops PGM, Beaumont CAA, Borghi A, et al. Comparison of three-dimensional scanner  
436 systems for craniomaxillofacial imaging. *J Plast Reconstr Aesthetic Surg*. 2017;70(4):441-  
437 449. doi:10.1016/j.bjps.2016.12.015
- 438 19. Honrado CP, Larrabee WF. Update in three-dimensional imaging in facial plastic surgery.  
439 *Curr Opin Otolaryngol Head Neck Surg*. 2004;12(4):327-331.  
440 doi:10.1097/01.moo.0000130578.12441.99
- 441 20. Guo Y, Rokohl AC, Lin M, Heindl LM. Three-dimensional anthropometry in periorbital  
442 region. *Ann Eye Sci*. 2021;6:8-8. doi:10.21037/aes-20-99
- 443 21. Hyer JN, Murta F, Juniat VAR, Ezra DG. Validating three-dimensional imaging for  
444 volumetric assessment of periorbital soft tissue. *Orbit (London)*. 2021;40(1):9-17.  
445 doi:10.1080/01676830.2020.1711780
- 446 22. Da Silveira AC, Daw JL, Kusnoto B, Evans C, Cohen M. Craniofacial Applications of  
447 Three-Dimensional Laser Surface Scanning. *J Craniofac Surg*. 2003;14(4):449-456.  
448 doi:10.1097/00001665-200307000-00009
- 449 23. Hammond P. The use of 3D face shape modelling in dysmorphology. *Arch Dis Child*.  
450 2007;92(12):1120-1126. doi:10.1136/adc.2006.103507
- 451 24. Krimmel M, Schuck N, Bacher M, Reinert S. Facial surface changes after cleft alveolar  
452 bone grafting. *J Oral Maxillofac Surg*. 2011;69(1):80-83. doi:10.1016/j.joms.2010.03.009
- 453 25. van Loon B, Maal TJ, Plooiij JM, et al. 3D Stereophotogrammetric assessment of pre- and  
454 postoperative volumetric changes in the cleft lip and palate nose. *Int J Oral Maxillofac*

- 455 *Surg.* 2010;39(6):534-540. doi:10.1016/j.ijom.2010.03.022
- 456 26. Van Loon B, Van Heerbeek N, Bierenbroodspot F, et al. Three-dimensional changes in  
457 nose and upper lip volume after orthognathic surgery. *Int J Oral Maxillofac Surg.*  
458 2015;44(1):83-89. doi:10.1016/j.ijom.2014.08.001
- 459 27. Tenhagen M, Bruse JL, Rodriguez-Florez N, et al. Three-Dimensional Handheld Scanning  
460 to Quantify Head-Shape Changes in Spring-Assisted Surgery for Sagittal  
461 Craniosynostosis. *J Craniofac Surg.* 2016;27(8):2117-2123.  
462 doi:10.1097/SCS.00000000000003108
- 463 28. Wong JY, Oh AK, Ohta E, et al. Validity and reliability of craniofacial anthropometric  
464 measurement of 3D digital photogrammetric images. *Cleft Palate-Craniofacial J.*  
465 2008;45(3):232-239. doi:10.1597/06-175
- 466 29. Guo Y, Rokohl AC, Schaub F, et al. Reliability of periocular anthropometry using three-  
467 dimensional digital stereophotogrammetry. *Graefe's Arch Clin Exp Ophthalmol.*  
468 2019;257(11):2517-2531. doi:10.1007/s00417-019-04428-6
- 469 30. Nightingale RC, Ross MT, Allenby MC, Woodruff MA, Powell SK. A Method for  
470 Economical Smartphone-Based Clinical 3D Facial Scanning. *J Prosthodont.*  
471 2020;29(9):818-825. doi:10.1111/jopr.13274
- 472 31. Mai HN, Kim J, Choi YH, Lee DH. Accuracy of portable face-scanning devices for  
473 obtaining three-dimensional face models: A systematic review and meta-analysis. *Int J*  
474 *Environ Res Public Health.* 2021;18(1):1-15. doi:10.3390/ijerph18010094
- 475 32. Mai HN, Lee DH. The effect of perioral scan and artificial skin markers on the accuracy  
476 of virtual dentofacial integration: Stereophotogrammetry versus smartphone three-  
477 dimensional face-scanning. *Int J Environ Res Public Health.* 2021;18(1):1-12.

- 478           doi:10.3390/ijerph18010229
- 479    33.   Mai HN, Lee DH. Accuracy of Mobile Device–Compatible 3D Scanners for Facial  
480           Digitization: Systematic Review and Meta-Analysis. *J Med Internet Res.* 2020;22(10).  
481           doi:10.2196/22228
- 482    34.   Aung SC, Ngim RCK, Lee ST. Evaluation of the laser scanner as a surface measuring tool  
483           and its accuracy compared with direct facial anthropometric measurements. *Br J Plast*  
484           *Surg.* 1995;48(8):551-558. doi:10.1016/0007-1226(95)90043-8
- 485    35.   Bellus3D. ARC Face Scanning System Overview for Developers ARC : Array  
486           Reconstruction Cameras.  
487           [https://www.bellus3d.com/\\_assets/downloads/arc/B3D\\_ARC\\_Overview\\_for\\_Developers\\_](https://www.bellus3d.com/_assets/downloads/arc/B3D_ARC_Overview_for_Developers_v2.pdf)  
488           v2.pdf.
- 489    36.   Bellus3D. Bellus3D ARC Developer APIs. :1-30.  
490           [https://b3ddownload.azureedge.net/arcsdkdoc/ARC\\_Developer\\_APIs\\_1.12.2.pdf](https://b3ddownload.azureedge.net/arcsdkdoc/ARC_Developer_APIs_1.12.2.pdf).  
491
